# Supplementary material for: Description and characterization of a novel live-attenuated tri-segmented Machupo virus in Guinea pigs
Source: PubMed Central journal article supplement (PMC5992841; doi:10.1186/s12985-018-1009-4), 2018-06-07
Supplement: 12985_2018_1009_MOESM2_ESM.pdf [file 12985_2018_1009_MOESM2_ESM.pdf]

1 **SUPPLEMENT FILE 2**

2 **NP sequence of r3MACV**

3 ATGGCTCACTCCAAGGAAATCCCAGCTTTCGGTGGACTCAGTCACTGAGAAGAGGCCTGAGTCAGTTCACCC  
4 ACACTGTGAAAACAGATGTGTTGAAAGATGCCAAGCTCATAGCTGACAGCATCGACTTCAACCAGGTTTCACA  
5 AGTGCAGAGGGCTCTCAGAAAGAACAAAAGGGGTGAAGAGGATCTGAACAAGCTGAGGGATTTAAACAAAG  
6 AAGTGGATAGGCTCATGTCTATGAAAAGCATCCAGAAAAACACCATATTCAAGATTGGAGATCTGGGGAGAG  
7 ATGAATTGATGGAGCTTGCATCAGACTTGGAAAACTGAAGAACAAGATAAAGAGGACTGAGTCAGGTCCCC  
8 AAGGGCTGTACATGGGTAATTTGTCACAGCTGCAACTGACAAAGAGGTGAGAAATCTTAAAAACCTGGGATT  
9 CCAACAGCAGAGAGGTGCTGGAAATGGTGTGGTTAGAATCTGGGATGTCTCAGATCCATCAAACCTGAATAAT  
10 CAGTTTGGTTCCATGCCAGCTCTACAATCGCTTGTATGACTGTCCAGGGTGGAGAAACGATGAATAGTGTGG  
11 TCCAAGCGTTGACATCTCTGGGCCCTGTATACACTGTTAAATATCCGAATTTAAATGACCTTGACAAGCTAACTC  
12 TAGAGCACGAATGCTTGCAGATCGTAACTAAGGACGAGAGCTCCATCAACATCTCTGGCTATAACTTCAGTCTG  
13 TCAGCTGCTGTGAAAGCTGGCGCCTCAATACTTGACGGTGGGAACATGCTGGAAACAATTAGGGTCACTCCTG  
14 ATAATTTCTCCAGCTTGATTAATCAACTCTGCAAGTCAAGCGAAAAGAGGGGATGTTTATAGACGAGAAACC  
15 TGGGAATCGAAATCCTTATGAGAACCTTCTGTATAAATTGTGTCTCTCAGGTGACGGGTGGCCTTACATTGGTT  
16 CCAGATCACAATTCTTGGGAGATCTTGGGACAACACAAGTGTGATCTAACAAAGAAACCTCAAGTTGGACC  
17 GAGACAACCCGAGAAAACGGTCAGAATCTAAGACTAGCAAACCTGACTGAAATGCAAGAAGCAGTGATTAA  
18 AGAGGCTGTAAAGAAGTTAGACCCCACTAATACTGTGGCTTGCCATTGAAGGGCCTCCAACAGACCCTGTG  
19 GAATTGGCACTATATCAGCCAGCCAACAAGCATTATATTGTTTGTAGAAAGCCACATGATGAGAAGGGCTT  
20 CAAAAATGGCAGCAGACATTCACATGGCATCTTGATGCAAGACATCGAGGATGCAATGCCAGGAGTATTAAGT  
21 TATGTAATAGTTTACTACCACAAGATATGGTGATTACAACCTCAAGGTTCTGACGACATAAGGAACTTTTAGA  
22 CATTGATGGACGGAAGGATTTAAAGCTGGTAGATGTGAAACTCACATCTGATCAAGCAAGACTCTATGATCAG  
23 CAAATTTGGGAGAAGTTTGGACATCTTTGCAAACATCATAATGGAGTTGTTGTCAACAAGAAAAGAGAGAAA  
24 AAGACTCTCCATTCAAATTGAGTTCTGGTGAACCTCACTGTGCTCTGTTGGATTGTATCATGTATCAATCAGTGA  
25 TGGATGGCAAATGGTAGATGAAGAACCAGTGGCACTTTTACCTCTCAGCCTTCTATTTCTACCCAAGGCAGCC  
26 TTTGCACTGTAA

27

28 **GPC sequence of r3MACV**

29 ATGGGGCAGCTTATCAGCTTCTTTCAGGAGATTCTGTTTTTCTACAGGAAGCTCTGAACATCGCTTTAGTGGCT  
30 GTTAGTCTCATAGCTGTCATCAAAGGCATCATTAACTTTACAAAAGTGGTCTCTTCCAGTTCATCTTCTTTCTCC  
31 TCCTAGCAGGGAGGTCTGCTCGGATGGCACATTCAAATAGGCCTACACACTGAGTTCAGTCAGTCACCCCTT  
32 ACCATGCAGAGACTTTTAGCTAACCATTCAAATGAGCTCCCATCTCTGTCATGCTTAAACAATAGTTTTTATTAT  
33 ATGAGGGGAGGTGTGAACACCTTCTGATTTCGTGTTTCTGATATTTAGTCTCATGAAGGAGTATGATGTATC  
34 AATCTATGAACCAGAGGATCTTGGAAATTGTCTTAACAAGTCTGACTCAAGCTGGGCTATTCATTGGTTCTCAA  
35 ATGCTTTGGGACATGACTGGCTTATGGATCCTCCAATGCTATGTAGAAAACAAGACAAAGAAGGAGGGATCTAA  
36 CATTCAATTCAACATCAGCAAAGCTGATGATGCCAGAGTGTATGGAAAGAAGATAAGAAATGGTATGAGGCA  
37 TCTCTTCAGGGGCTTCCATGACCCGTGTGAGGAAGGGAAAGTGTGCTACCTGACCATCAATCAGTGTGGTGAC  
38 CCCAGTTCTTTGACTACTGTGGCGTGAATCATCTTTCAAATGTCAGTTTGACCATGTGAACACCCTTCATTTCC  
39 TTGTGAGAAGTAAGACACATCTCAACTTTGAGAGGTCTTTGAAAGCATTCTTCTCATGGTCTCTGACAGACTCCT  
40 CAGGAAAGGACATGCCAGGAGGTTATTGTCTAGAGGAATGGATGTTGATAGCAGCCAAAATGAAATGTTTCG  
41 GAAACACTGCTGTTGCTAAATGTAATCAAATCATGACTCAGAGTTCTGTGATATGCTGAGGCTATTCGACTAT  
42 AACAAGAATGCAATAAAGACCCTCAATGATGAATCAAAGAAAGAAATCAATCTTCTAAGCCAGACAGTGAATG  
43 CCTTAATCTCAGATAATTTGTTAATGAAGAATAAAAATTAAGAGCTAATGAGCATCCCTTATTGTAATTACACAA  
44 AGTTTTGGTATGTCAATCATACCCTGACAGGGCAGCACACTCTCCAAGATGTTGGTTGATAAGGAATGGAAG  
45 TTATCTAACACTTCTGAATTCAGGAATGACTGGATTTAGAGAGTGTACCTCATCTCAGAGATGTTAAGTA

46 AGGAATATGCTGAAAGGCAAGGCAAACCCCAATCACATTAGTTGATATTTGTTTCTGGAGCACAATTTTCTTC  
47 ACAGCATCATTGTTCTTCATCTAGTCGGAATACCCACCCATCGACACCTCAAAGGCGAAGCCTGTCCTTTGCCT  
48 CATAAGCTGGACAGCTTCGGAGGTTGTAGATGTGGCAAATATCCCAGATTGAAGAAACCCACCATCTGGCACA  
49 AAAGACATTAA

50

51

52 **L sequence of r3MACV**

53 ATGGATGAATATGTCCAAGAGTTGAAAGGGCTTATTAGAAAGCACATTCTGAGAGGTGCGAGTTTGGACATC  
54 AAAAGGTCACATTCTATCTCAGGTGCATCCCAGTCCCTTGCTCACAGAAGGCTTCAAGTTGCTCTCTAGTCTTG  
55 TTGAACTTGAGTCTGTGAAGCACACGCCTGCCAGGCAAACACTGATCAAAGATTCGTAGATGTAATACTATCT  
56 GACAATGGGATTTTATGTCCAACCTTACCAAAGGTGATCCCCGATGGGTTCAAATTAAGTGGGAAAACCTAAT  
57 TCTGCTGGAGACCTTTGTAAGAGTAAACCCAGATGAGTTCGAGAAGAAATGGAAAGCTGACATGTCAAAGCTT  
58 TTAACCTGAAGCATGACCTGCAAAGTGGGCGTGACTTTGGTTCCTATTGTTGATGGCAGGAGCAATTACA  
59 ACAATAGATTTGTTGCTGATTGGGTGATTGAAAGAATAAGATGGTTGCTTATCGAGATTTTGAAGCATCCAA  
60 ATCCATGCTTGAGATTGATATTGAGGACCAGGAATATCAACGATTAATTCATAGTCTATCAAACGTTAAGAATC  
61 AAAGCTGGGGTTGGAAAACCTAGAACATTTGAAAAGGAATCTTTAGATTATGATGAGAGGTTGAATGAGTC  
62 ATTGTTTATTGGTTTGAAGGAGACATTAGAGAGTCGACAGTGAGGGAAGAACTCATCAAACCTAAATTGTGG  
63 TTCAAGGATGAGGTATTCAGCAAAGGTCTGGGCAAATTCAAATTGACTGACAGAAGGGAATTATTAGAGTCCC  
64 TATCGAGCTTAGGTGCTCATCTAGATAGTGATGTGTCAAGCTGTCCCTTTTGAACAATAAGTTGATGGAAATT  
65 GTTTACAATGTGACCTTTAGCTGTGTTGAAAGGACCGATGGTGTAGCCACAGTGGACCAGCAGTTTAGACCA  
66 CACTCTAACATAGAAAAACATTACCTTAGTGTCTTATCTTTGTGCAATAAAAATAAGGGGTTGAAGGTCTTT  
67 AACACCAGAAGAAACACCCTACTATTCTTAGATCTCATAATGGTTAATTTGATGGTTGACATTAGTGACAGTTG  
68 CCAGGACGCGATTGAAAGTTTGAAGAAATCGGGATTGATAGTGGGTCAGATGGTTATGTTAGTGAATGATAG  
69 AGTGCTGGACATTTTGGAGGCTGTTAACTCATCAGAAAAAAGATTGGGACTAATCCCAATTGGGTCAAGAAT  
70 TGTTCAAAAATTCTAGAGAGATCACATCCAGAAATATGGCATCACTTAAGCACTTTGATAAAGCAACCAGACTT  
71 CAATAGCTTGATTTCAATAGCCCAACATCTTGTCTCAGATAGACCAATTATGAGGTATTCAGTGGAAAGAGGCT  
72 CTGATAAGATTTGTAGACATAAATTGTTCCAGGAGATGTCTAGCTTTGAGCAAATGAGGTTATTCAAGACTTTG  
73 TCCTCAATATCCTTGTCACTAATCAATTCTATGAAAACATCCTTTTCTCGAGATTGCTTGTGAATGAGAGAGAA  
74 TTTTCTAAGTACTTTGGTAATGTTAGACTCAGAGAGTGTTATGCCCAAAGGTTTTATTGGCTGAGAGTTTAGTT  
75 GGCTTTCTTTCTATCAAAAACAGGTGAAAGGTCCAGGTGTTATTCAGTTTATTTATCTGATAACGGTGTGAT  
76 GTCAGAACAGGGTTCATTTTATTGTGATCCAAAGAGATTCTTCTTGCCTGTTTTTCTGATGAAGTTTTGGCTGG  
77 AATGTGTGAGGAAATGACAAGCTGGCTGGATTTTACACCGGATTAATGAATGACTGGGCCATATTAAGG  
78 TTGTTAGTTCTGGCTATACTCTGCTCCCCATCAAAGAGGAATCAAACCTTTCTACAAGGATTAAGATACTTTTTA  
79 ATGGCTTTTGCTAACCAAATTCATCATATCGACCTGACATCTAAATTGGTAGTGGAATGCAAGTCAAGTTCAGA  
80 AGTGGTGGTTCAAAGGCTTGCAAGTGGGACTCTTATTAGACTACTTAGTGGTGAGTCAGATGCAAGTTATTTT  
81 TCTCAAGAAGATTCAAATATCTGCTAAATGTTAGTTACCTTTGCCATTTAATCACAAGAAACGCCTGACCGAT  
82 TAACAGATCAGATCAAGTGTGTTGAGAAGTTCATTGAGCCCAAAGTTAAGTTTGGATGTGCTGTGGTGAACCC  
83 ATCTCTAAATGGAAAGCTGACTGTAGATCAGGAGGATATTATGATAAATGGTTTAAAGAAGTTTTTTTCAAAT  
84 CCTAAGGGGACTGAGGATGTGCAGACACCAGGTGTGTGTAAGAACTCTTAAATTATTGTGTGTCTTTGTTT  
85 AATAGGGGAAAGTTAAAGGTTTCTGGGGAGCTTAAAAATAATCCCTTTAGACCTAATAACAAGTACTGCTTT  
86 GGACTTATCAAGTAACAAGAGTGTGTTATACCAAACACTAGATGAGTTAGGCAACATCCTCTCCACCTATGACA  
87 AGGAAAAACTAGTGTGAGCATGTGTTTCTCTATGGCAGAGAGGTTTAAACCAAAGGAAGGTACAATCTAGA  
88 TCCAGATTCAACTGACTATTTGATTCTAAAAAATCTGACAGGTTTGGTGAAGTGCAGGGCCGAAAGCTAAGAGT  
89 ACTCAAGAAGAATTGTCTTTAATGTACGAGGCGTTAACAGAAGAACAGGTTGAATCATTCAACGAAATTAAC  
90 ATGATGTACAAGTTGCCTTAGCCAAGATGGCTGACAACAGTGTGAACACAAGAACTAAAAATCTCGGCCGAGC  
91 TGATAATTCAGTAAAAAATGGGAATAATCCTTTGGACAATTTGTGGTCACCTTTTGGGGTGATGAAAGAGATT

92 AGAGCTGAAGTATCGTTACACGAAGTCAAGGATTTTGACCCAGATGTTCTTCTCCTGAGGTGTACAAGGAGT  
93 TGTGTGACGCAGTTTACAAATCGTCAGAAAAATGCAACTTCTTCTTGAGGGAGTACTTGATGTCTGTCCCTTG  
94 GGGTTGCTGCTGAAAAATCTGACCACATCAAGTTATGTGGACGAAGAGTATTTTATGTGTTTTAAATACCTCTT  
95 GATACAAGGTCACCTTTGATCAAAAACTAGGAAGTTATGAGCACAAAAGCAGATCTAGACTGGGTTTCACCGAT  
96 GAGACATTAAGACTCAAAGACGAGGTTAGACTTAGTATAAGAGAAAAGCAACTCAGAGGCGATTGCAGACAAG  
97 TTGGATAAAAGTTACTTCACCAATGCCGCATTAAGGAATCTGTGTTTTTATTCTGAAGATTCGCCCACTGAGTTC  
98 ACAAGCATTAGTTCCAACCTCAGGAAACCTTAAATTTGGTCTAAGTTATAAGGAACAGGTGGGTTCAAACAGAG  
99 AGCTCTATGTAGGAGACCTCAACACAAAACCTGATGACAAGATTGGTGGAGGATTTTTCTGAAGCTGTAGGGAA  
100 TTCTATGAAGTACACCTGTCTGAACTCTGAAAAAGAATTTGAACGGGCCATTTGTGACATGAAGATGGCAGTG  
101 AATAATGGTGATTTTGTGATGTTCTTATGATCACTCAAATGGGGTCCAACAATGAGTCTGCACCTTTTCTGGCA  
102 TTATTACAAATGCTGGAATTGAGAACCCTGTTGACAGGTCAAAAATTGATCTTGATTCTGTTAAAAGTATACT  
103 GAAATGGCACCTTCACAAAGTTGTAGAAGTGCTATCAATGTGGCTGAAGCCTACTGTATTGGAAAGCTAAAA  
104 AGGTCCCTTGGATTGATGGGCTGCGGTTCCACCAGTTTGAGTGAAGAATTCTCCATCAGACCATGCAGTTAAA  
105 TGGTCAGATTCTAGTCACATTATGTCTGTTTTGGACATGGGGCAAGGGATACTACATAACACTTCTGATTTGT  
106 ATGGATTAATCACAGAGCAATTTTTGTGTTATGCACTCGATCTTTTGTATGATGTAATCCCTGTGTCATATACT  
107 CTAGTGACGATCAGATCACTCTTATCAAGACACCTTCTCTGGATATAGAAGGGGGTTCAGATGCTGCGGAGTG  
108 GCTAGAAATGATCTGCTTCCATGAGTTTCTGTCATCTAAATTGAATAAGTTTGTGAGTCCCAAGAGTGTGTCG  
109 GGACTTTTGTGCGAGAGTTCAAATCAAGATTTTTTGTGATGGGTGAAGAAACACCATTGCTCACAAAGTTTGT  
110 GCTGCAGCTTTACACAATGTAAAGTGTAAAACCCACACAATTGTCAGAAACTATAGATACCATCTGTGATCA  
111 ATGCATTGCAAATGGAGTCAGCACCAAATAGTGACAAGAATATCTAAGCGAGTTAACCAATTAATTAGATAC  
112 TCCGGATATGGAGAGACCCCTTTGGGGCTATTGAAGATCAAGATGTGAAAGACTGGGTGGATGGCTCAAGG  
113 GGTTACCGTCTACAGAGAAAGATTGAAGCTATCTTTCATGATGACAAGGAAACCTCTTTTATTAGGAACTGTGC  
114 CAGAAAGTTTTTAATGATATAAAGCGTGGCAGAATTTTGAGGAGAATCTGATCAATTTGATTGGTAGAGGT  
115 GGTGATGAGGCCTTGACTGGTTTTTACAGTATGCAGGTTGCAGTGAACAAGAAGTTAATCGCGTGTGAACT  
116 ATAGATGGGTGAATTTATCAAGTTTTGGAGATCTTAGGTTAGTTTTGAGGACAAAGTTGATGACAAGTAGAAG  
117 AGTTCCTGAAAGGGAGGAAGTGCCAACCTTAATTAACCTTGCAATCCAACTTTCCAGAACTTCACAAAAG  
118 GAGTTAAGAAGATCCTTGCTGAGTCAATTAATAAGTCAGCTTCCAGTCATCCGTTGCTAGCGTTTTTATTGGG  
119 TTCTGCAAAAGCATGGGTAGCAAGTGCGTTAGAGATGGGAAAGGGGGATTCTTATACATAAAAGAAGTGAT  
120 TCAGGTGTAAGTGCTGTACATGTGAAATATGTGCGTTAAAGCCCAAGATCATATATTGCAACAACCTACTTAA  
121 CAAAGTGAGTCAGTTTTCAAACCTATTTTGTGGGATTATTTTTATTAGTCTTAACAAATGCATGTGAACTTGG  
122 AGAGTGGGTGTTTTCCACAGTTAAAGAGCCCCAAAAGCCATTGGTGTGAAACAACCAAACTTTTTTTGGGCTG  
123 TGAAGCCTAAAGTGGTGAGACAAATTGAGGATCAACTGGGAATGAACCATGTTCTGCAATCTATAAGGAGAA  
124 ATTATCCAGTTCTTTTTGACGAACACTTGACTCCATTTATGAATGATCTTCAGGTCAGCAGAACAAATGGATAGC  
125 GGGAGGCTAAAATTTCTGGATGTCTGCATTGCTTAGACATGATGAATGAAAACCTGGTATCATCAGTCACCT  
126 GTTAAAAACCAGAGACAACAGTGTACATAGTTAAACAAAGTGATTGTGCCTTAGCACACATAAGGCAGTCA  
127 AGCTACACAGATTGGGAATTAGGACTTAGTCCGAGCAGATTTGCACAACTTCAAGACCCAGCTGGTCTTAT  
128 CTTCAATGGTAAACCCATTAGTCCCTTCAACATCTTGTCTGAAGTCATTTTTCTGGTTCAATGAAGTCTAGAGC  
129 TAGAGGATGATAGTCAAATTGAGTTAGCAGAATTGACTGACTTTGCCTTAATGGTTAAGAATCAAATGTTTCC  
130 AGAGCTATGTTTGTGGAGGATATCGCAATGGGGTATGTTGTCTCTAACTTCGAGGGTGTAGAATCTCGTTAA  
131 GCAACGTGATGGTTGATGGTGTCAATTGCCGCTCAGGAGAAGGCTCCTGATATAGGTGAATTGTTTGGATT  
132 GAAGGCTGAGAATGTCATTGTGGCCTAGTGGTGCAGATCGATCATGTAAGAATGTCAACGAAGTTCAAGTT  
133 GAAGAGAAAAATGGTGTATAGTTTCTTTTGAATGCATAATGGATGTAGGAGAGATCCAGAACAAAGAGGT  
134 TATTTGAAGGTGGTGGCAGTCGATCAGTCTGTGTCTGGGTGAGGAGAAACCATATGCTGCTGGATGGTGTG  
135 TCGGTTGTTGCAAGCCTCCCATTATTTACTGGGCAGGCCAGTTTTGATTTGGCTGCAATGTTAATCGAGTCAAA  
136 TCTGGCTGGCTCAAATGATAATTTCTTAATGAGAAATGTTACCTTGGATTTAGGTGGATTTTCCCAGAGTTGA  
137 GTGACAAATATTCTACAGGCTCTCGGGACCTGAAAACCAAGAGGATCCGTTGGTCTTGAAGGATGGTGCCTT  
138 CTATGTGGGAGGTGAGAGACTGTCCACATATAAAGTAGAGTTTACAGGTGATCTTGTGGTGAAGCATTGGG  
139 GGCCCTAGAAGATGATGAGAGTGTGTTTTCTATGCTGCACCAACTGTGGCCTATTTGAAAGCAACATCACAG

140 GTTATTTTGTTC AACAGGAAGATTTACCATTGTT CATGATTTGTACAAGAAACAGCTCACAAAATCAATTGAA  
141 AGCTTTGGCGAATGGATCGAATTTACCAACTTTAAGGTTGCCTATAGTAAATCACTCAAAGAGCTTGTGATATC  
142 AGACACCCAGGGGTCATT CAGACTGAAGGGTGTGATGTGTAGACCCCTGGCAAGCACGCCCAAGTGGAGGA  
143 CATTGAGTAA

144

145 **Z sequence of r3MACV**

146 ATGGGCAACTGCAATAAGCCTCCAAGAGGCCTCCAACACACAAACATCATCCAACCAACCCTCAGCAGAGT  
147 TCAGGAGAACAGCCCCACCCAGTCTCTATGGTCGCTACAACCTGCAAATGCTGTTGGTTTGCCGACACAACTTG  
148 ATTACATGTAACGACCACTACTTGTGCCTGAGATGTCATCAAACAATGCTCAGGAATTCTGAACTCTGTACAT  
149 ATGCTGGAAACCACTACCGACATCCATCACAGTTCCTGGAGCCAAGTGCCCCCCCACCATAA

150

151

152 **GPCΔ33 GTOV sequence**

153 ATGGGACAGTTAATCAGTTTCTTT CAGGACATACCGATCTTCTTTGAGAAGCACTCAATGTAGCCTTGCTGT  
154 GGTTACTGCTTGCTATTATAAAGGGCATTGTGAATGTTGGAAATCAGGAATTCTCAGCTGTTTGTGTTCTT  
155 GGTTCTGGCGGGAAGGTCATGCTCTTTCAAAGTTGGTCATACATAAAATTTGAGTCATTTACGGTTAAGCTAG  
156 GAGGTGTTTTT CATGAATTACCTTCACTATGTAGGGTCAACAACCTTACAGTCTAATTAGGCTTTCTCATAACA  
157 GTAATCAGGCATTATCAGTTGAGTATGTGGATGTGCACCCTGTCCTCTGTTCCGTCAGTCCAACCATACTCGAC  
158 AACTACACTCAATGTATAAAAGGCTCTCCAGAGTTTGATTGGATTCTGGGTGGACAATTAAGGGATTGGGAC  
159 ATGACTTTTTGAGGGATCCAAGAATCTGCTGTGAGCCTAAAAGACAACCTAATGCTGAATTTACATTCCAATTG  
160 AATTTAACAGATAGTCTGAGACCCATCACTATAGGAGCAAGATTGAGGTAGGCATCCGACATTTATTCGGGA  
161 ACTACATAACTAATGATAGCTATTCAAAAATGTCTGTGGTTATGAGGAACACTACCTGGGAAGGTCAATGCTCA  
162 AATAGTCATGTGAATACACTGAGATTTCTGTTAAAAATGCAGGTTACCTTGTGGAAAGAAAACCACTGGCATT  
163 TTTTAGTTGGTCACTTTCTGACCCAAAGGGTAATGACATGCCAGGTGGTTACTGTCTTGAAAGGTGGATGTTGG  
164 TTGCTGGGGATTTGAAGTGCTTTGGCAACACAGCTGTCGCCAAGTGTAATTTGAATCATGATTCTGAGTTCTGT  
165 GACATGTTGAGGCTGTTTGATTCAATAAGAATGCCATTGAAAAACTGAACAACCAAACCTAAAACCTGCTGTCAA  
166 CATGTTGACTCACTCAATAAATAGTCTAATATCTGATAATTTATTGATGAGAAACAACTGAAGGAGATTTTGA  
167 AGGTCCCATATTGCAACTACACAAGATTCTGGTACATAAACCACACGAAATCTGGTGAGCACTCACTGCCTCGG  
168 TGTTGGCTGGTCAAGTAATGGTTCCTATTTGAATGAGAGTGATTTTAGAAATGAGTGGATCTTGGAGAGTGATC  
169 ACCTAATAGCAGAGATGTTAAGCAAAGAATACCAAGATAGGCAGGGTAAAACCTCCCCTAACACTGGTTGATCT  
170 ATGTTTCTGGAGTGCAATCTTTTTACCACAAGTCTCTTTTTACACCTGGTTGGGTTCCCAACACATAGACATAT  
171 ACAGGGT

172

173 **GPCΔ33 CHAPV sequence**

174 ATGGGTCAACTTGTGAGTTTCTTT CAGGAAATTCCTAACATCATACAGGAAGCAATCAACATTGCTCTAATAGC  
175 TGTCAGCCTCATTGCTATCCTAAAAGGGTTGGTCAATCTGTGGAAAAGTGGTTTGTTCAACTCCTGGTCTTCCT  
176 TATTCTAGCTGGAAGGTCCTGCTCATTCAAATTTGGAAGATCCACAGAACTCCAAAACATCACAATAAACATGT  
177 TAAAGGTCTTTGAGGACCATCCTATTTCTTGACAGTGAACAAAACCTTTTATTACATCCGTGAAAGTGAGAAT  
178 GCAACATGGTGTGTAGAGATTGCTGCACTGGACATGTCTGTCTTGCTCTCGCCACATGATCCACGTGTAATGGG  
179 CAACCTATCAAACCTGTGTTACCCAGACATTAACATAGATCAGA ACTTCTAGGTCTATTGGAGTGGATTTTGA  
180 GAGCTCTGAAATATGATTTTCTAAATTATCCACCCCTTGTGTGAAAAAGTGACATCATCTGTCAATGAAACAC  
181 GCATT CAGATAAATGTGAGCGATAGTGCAGGTTCTCATGATTTCAAAGAAACCATGCTCCAAAGGCTGGCCAT

182 ACTATTTGGCACAAAATTGATGTTTGATAAAACACCTAAGCAGTTCATAGTTATCAGAAATCAGACTTGGGTGA  
183 ATCAGTGCAAGTCCAATCATGTCAACACGTTGCATTTGATGATGGCTAATGCTGGGCATGCTGTTAAATTAAGA  
184 AGATTGCAAGGGGTGTTCACTTGGACGATCACAGATGCTGCTGGCAACGACATGCCTGGAGGTTATTGTTTGG  
185 AAAGGTGGATGTTAGTCACATCTGACCTGAAATGTTTTGGCAACACTGCTCTTGCAAAGTGTAACCTAAATCAT  
186 GACTCTGAGTTCTGTGACATGTTGAAACTGTTTGAATTTAACAAAAAAGCAATTGAGTCATTGAATGACAACAC  
187 AAAGAACAAAGTCAATCTATTAACACATTCCATTAATGCTTTAATTTCTGACAATCTTTTGATGAAGAATAGATT  
188 AAAAGAGTTATTGGACACTCCCTACTGCAACTACACAAAATTCTGGTATGTCAACCACACCATCACAGGAGAGC  
189 ATTCACTTCCACGCTGTTGGATGGTTAAAAACAACAGCTACCTCAATGAAAGTGAATTTAGAAATGATTGGATT  
190 CTTGAGAGTGACCACTTGTGTCCGAAATGTTGAACAAAGAGTATTTTGACAGACAAGGGAAAACCCCAATAA  
191 CACTTGTGACATCTGCTTTTGGAGCACACTGTTCTTACAACAACATTGTTTCTCCATCTAGTAGGCTTCCCAAC  
192 TCACAGACACATTCAGGGA

193
