# Supplementary material for: Description and characterization of a novel live-attenuated tri-segmented Machupo virus in Guinea pigs
Source: PubMed Central journal article supplement (PMC5992841; doi:10.1186/s12985-018-1009-4), 2018-06-07
Supplement: 12985_2018_1009_MOESM3_ESM.pdf [file 12985_2018_1009_MOESM3_ESM.pdf]

1 **SUPPLEMENT FILE 3**

2

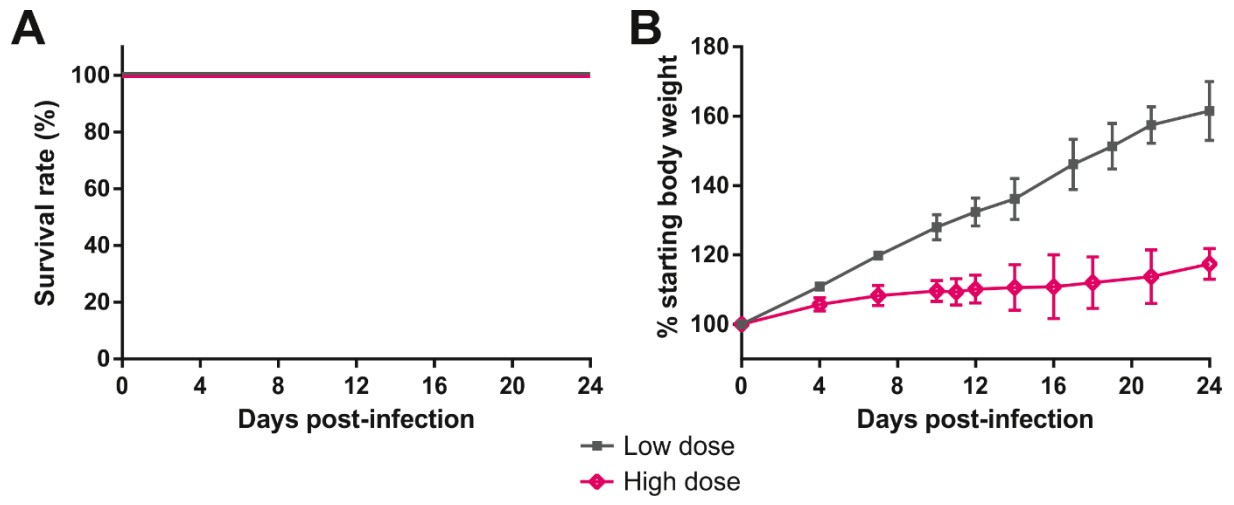

3

4
